# Supplementary material
Source: PubMed Central journal article supplement (PMC1599967)

S177T

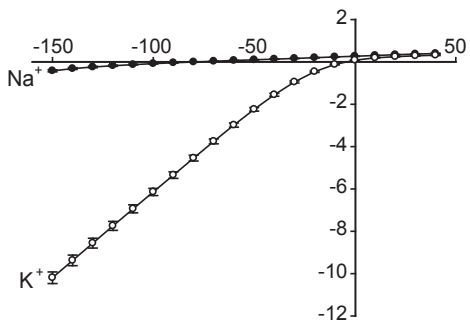

S177W

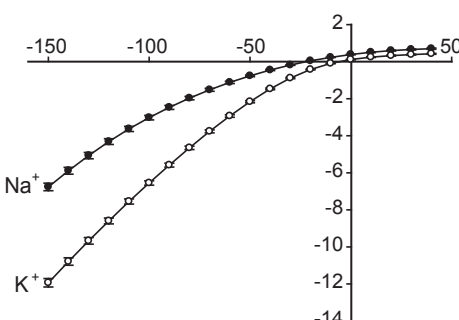

S177W-N184Q

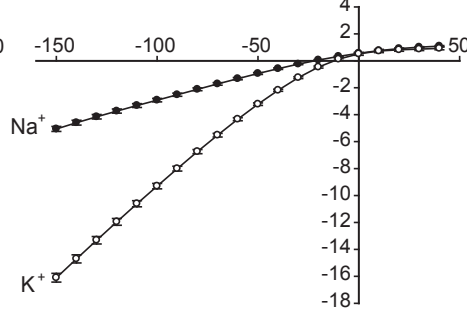

S177W-N184D

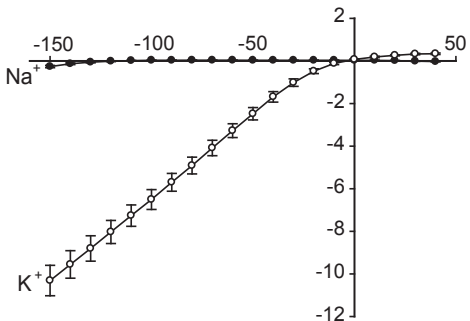

S177W-N184E

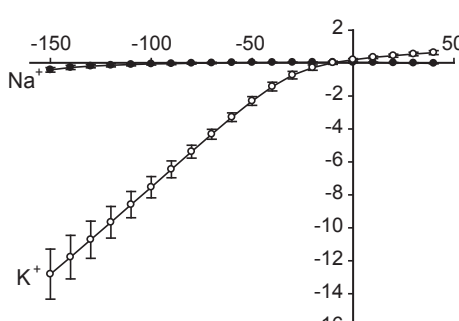

S177W-N184R

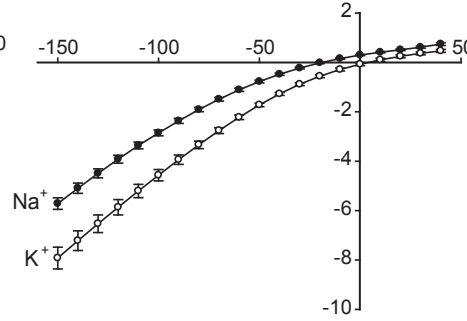

S177W-N184K

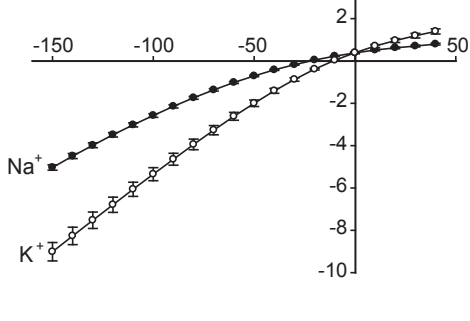

S177W-N184S

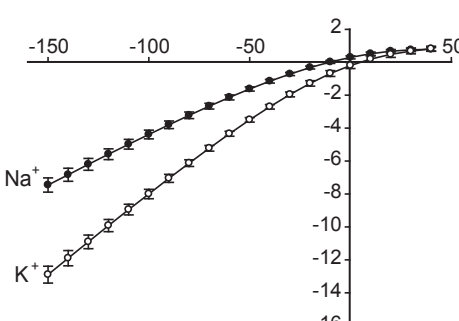

S177W-N184A

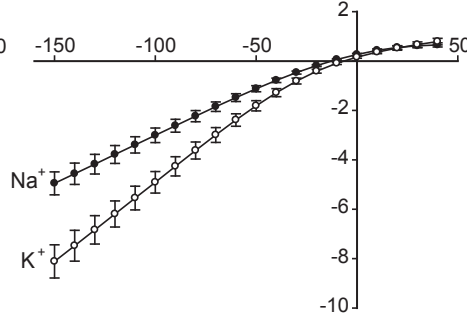

S177W-N184M

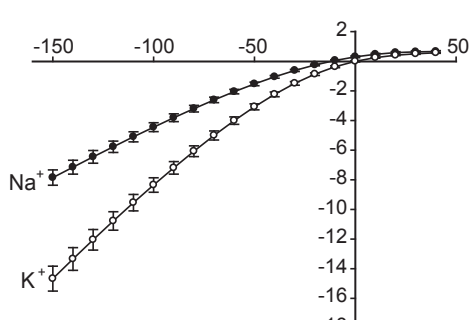

Supplement: pnas_0606660103_1.pdf [file pnas_0606660103_1.pdf]

S177T

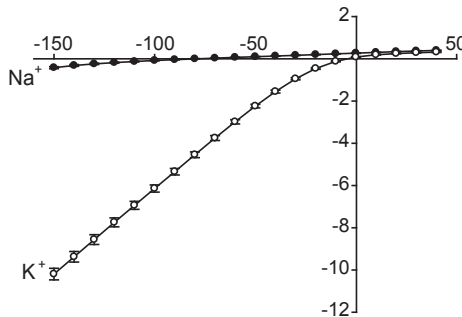

S177W

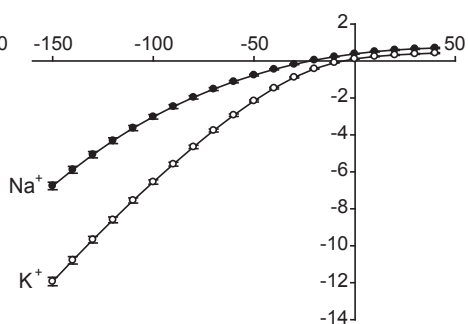

S177W-G180D

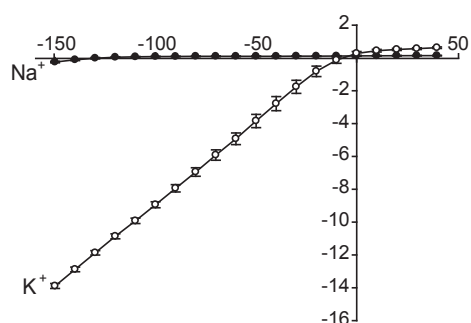

S177W-N184D

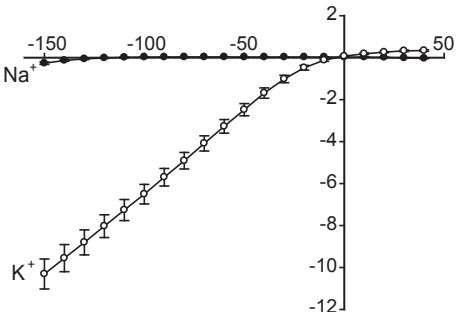

S177W-V188D

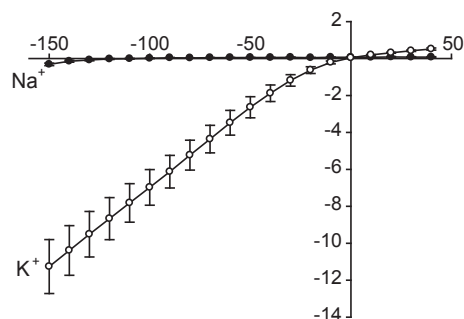

S177W-S181D

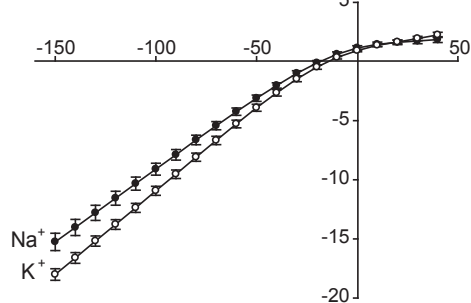

S177W-A185D

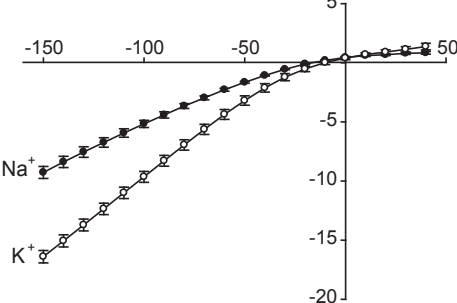

S177W-G189D

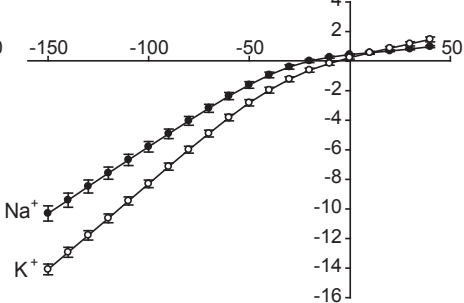

Supplement: pnas_0606660103_2.pdf [file pnas_0606660103_2.pdf]
